# Supplementary material for: Extended Release of Metronidazole Drug Using Chitosan/Graphene Oxide Bionanocomposite Beads as the Drug Carrier
Source: PubMed Central journal article supplement — ACS Omega. 2021 Jul 29;6(31):20433–44. doi: 10.1021/acsomega.1c02422 (PMC8359167; doi:10.1021/acsomega.1c02422), 2021-07-29
Supplement: ao1c02422_si_001.pdf [file ao1c02422_si_001.pdf]

**Extended-release of metronidazole drug using chitosan/graphene oxide bio-nanocomposite beads as drug carrier**

Gyanendra Kumar<sup>1</sup>, Karan Chaudhary<sup>1</sup>, Navin Kumar Mogha<sup>1,2</sup>, Arun Kant<sup>1</sup> and Dhanraj T. Masram<sup>1\*</sup>

<sup>1</sup>Department of Chemistry, University of Delhi, Delhi-110007, India

<sup>2</sup>Shriram Institute for Industrial Research, Delhi-110007, India

**TABLE OF CONTENTS**

|                                                             |    |
|-------------------------------------------------------------|----|
| 1. Thermogravimetric analysis (TGA)                         | S2 |
| 2. Digital photograph of MTD-Chi/GO bio-nanocomposite beads | S3 |
| 3. Drug release kinetics                                    | S4 |

## 1. Thermogravimetric analysis (TGA)

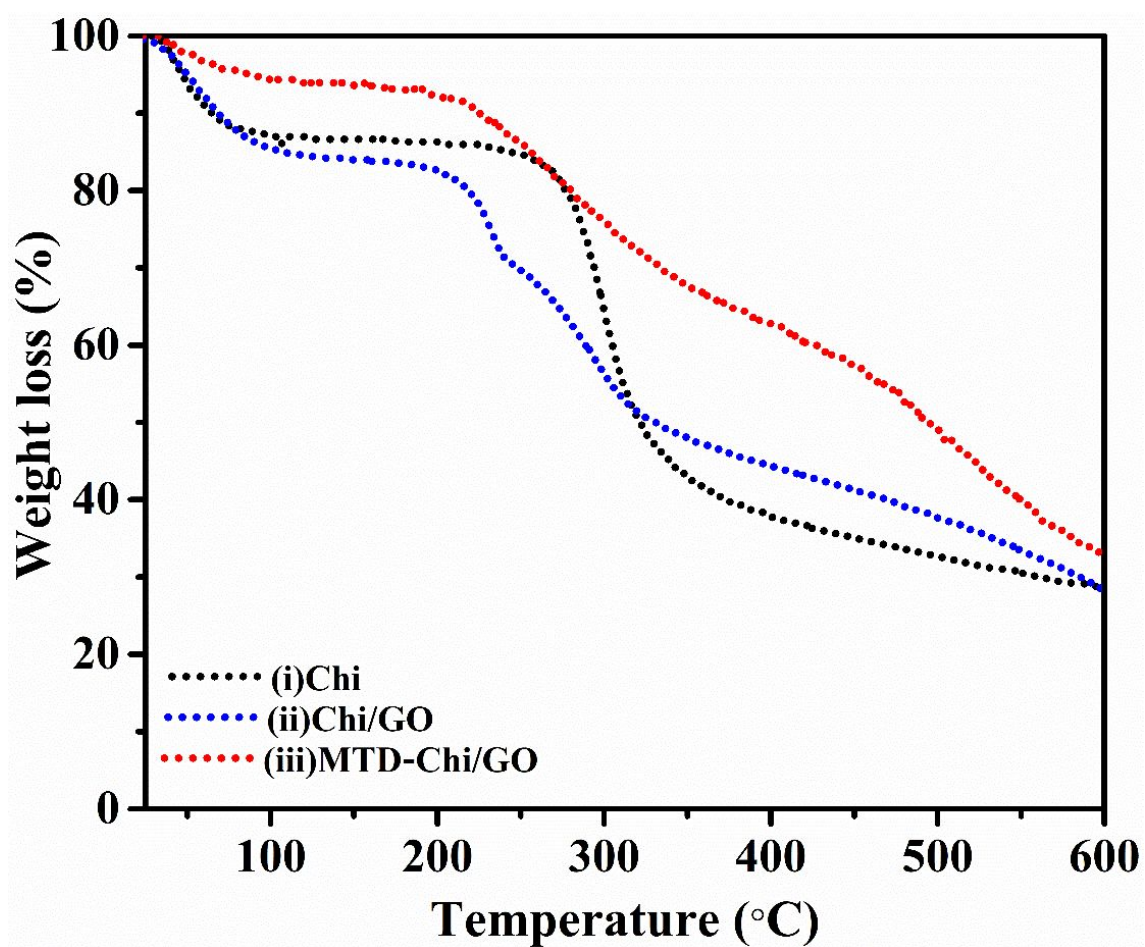

Figure. S1. TGA spectra of (i) Chi, (ii) Chi/GO and (iii) MTD-Chi/GO bio-nanocomposite beads.

**2. Digital photograph of pure chitosan, MTD-Chi and MTD-Chi/GO bio-nanocomposite beads**

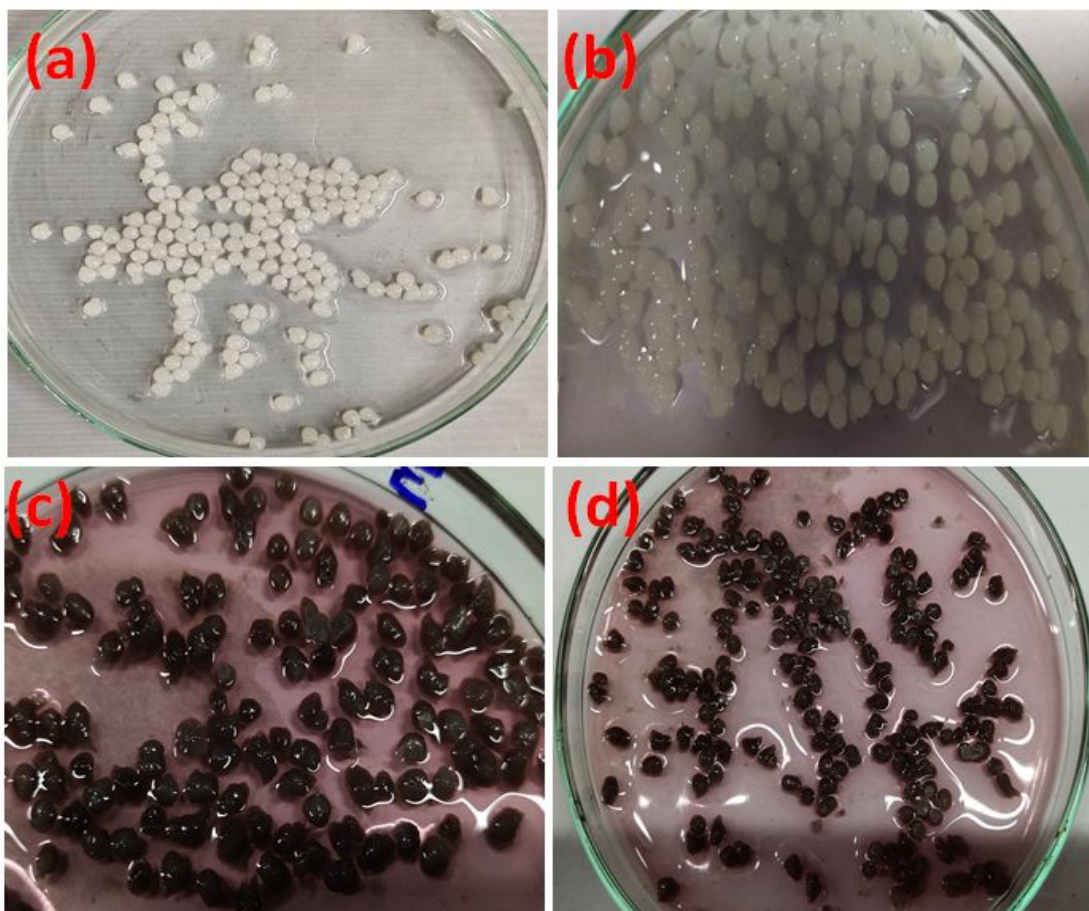

**Figure: S2.** Digital photograph showing of (a) Pure chitosan (b) MTD-Chi and (c-d) MTD-Chi/GO bio-nanocomposite beads.

### 3. Drug release kinetics

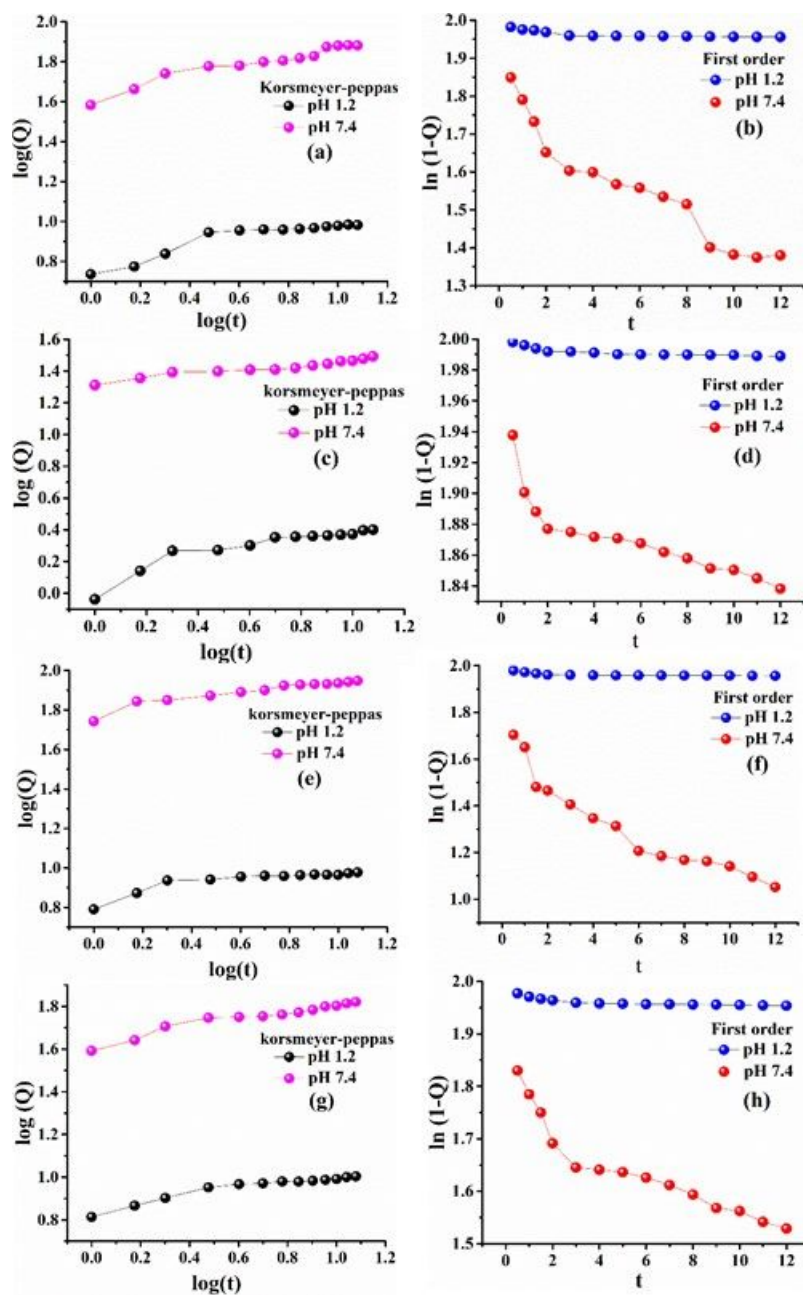

**Figure. S3.** Drug release kinetics of (a and b) *Korsmeyer-pappas* & *First-order* reaction of MC6, (c and d) *Korsmeyer-pappas* & *First-order* reaction of MC8, (e and f) *Korsmeyer-pappas* & *First-order* reaction of MCG12, (g and h) *Korsmeyer-pappas* & *First-order* reaction of MCG16 at pH 7.4 and pH 1.2 respectively.
